# Supplemental Information

## Synthesis and Polymerase Activity of a Fluorescent Cytidine TNA Triphosphate Analogue

Hui Mei<sup>#</sup>, Changhua Shi<sup>#</sup>, Randi M. Jimenez, Yajun Wang,  
Miramar Kardouh, and John C. Chaput<sup>\*</sup>

Department of Pharmaceutical Sciences, University of California, Irvine, CA 92697-3958.

<sup>\*</sup> To whom correspondence should be addressed. E-mail: jchaput@uci.edu

<sup>#</sup> These authors contributed equally to the manuscript

## Table of contents

|                                                              |      |
|--------------------------------------------------------------|------|
| Expression and Purification of Kod-RI                        | 3    |
| X-ray crystallography of tC <sup>f</sup> nucleoside <b>5</b> | 3-4  |
| Pre-Steady State Equations                                   | 4    |
| Table S1. Crystal data and structure refinement for <b>5</b> | 5    |
| Table S2. Oligonucleotides used in this manuscript           | 6    |
| Figure S1. Purity analysis of IR-dye labelled primers        | 6    |
| Figure S2-S14. NMR spectra of compounds <b>3-10</b>          | 7-13 |

### **Expression and Purification of Kod-RI.**

Kod-RI was generated as previously described. Briefly, the Kod-RI gene was sub-cloned into a pET21 vector and transformed into an Acella® cell (Edge BioSystems, MD) strain for protein expression. A single colony from the transformation was used for 10 ml LB overnight culture and then the overnight culture was diluted with 1:100 into the fresh LB for the large scale expression. The cells were induced with 1 mM of IPTG for 20 hat 18 °C. Once the cell density reached (OD600) 0.8, the cell pelleted, re-suspended in a lysis buffer (10 mM Tris.Cl pH 7.5, 100 mM NaCl, 0.1 mM EDTA, 1 mM DTT, 10% glycerol) and lysed by sonication. Then the cell lysate was clarified by centrifugation, and the clear lysate incubated for 20 min at 70 °C. The lysate was cooled to 24 °C and clarified by centrifugation to remove the denatured *E. coli* proteins. The clarified cell lysate was purified using a HiTrap Q-HiTrap heparin coupled column system with FPLC (GE, Marlborough, MA). Using this system, the Q column captures the nucleic acid from the cell lysate and the heparin column captures the polymerase. After sample loading, the Q column was decoupled from the heparin column and the polymerase was eluted from heparin column using a mobile phase of (10 mM Tris.Cl pH 8.5, 1M NaCl, 0.1 mM EDTA, 1 mM DTT, 10% glycerol). The elution fractions were pooled together and then dialyzed into the protein storage buffer (10 mM Tris.Cl pH 8.5, 200 mM NaCl, 0.1 mM EDTA, 1 mM DTT, 10% glycerol). The purified protein was analyzed by SDS PAGE and UV quantified.

### **X-ray crystallography of compound 5**

An analytical sample of **5** was crystallized from methanol and a trace amount of water. The yellow crystal of dimensions 0.212 x 0.240 x 0.380 mm was mounted in a cryoloop and transferred to a Bruker SMART APEX II diffractometer. The APEX2<sup>1</sup> program package was used to determine the unit-cell parameters and for data collection (10 sec/frame scan time for a sphere of diffraction data). The raw frame data was processed using SAINT<sup>2</sup> and SADABS<sup>3</sup> to yield the reflection data file. Subsequent calculations were carried out using the SHELXTL<sup>4</sup> program. The diffraction symmetry was *mmm* and the systematic absences were consistent with the orthorhombic space group  $P2_12_12_1$  that was later determined to be correct.

The structure was solved by direct methods and refined on  $F^2$  by full-matrix least-squares techniques. The analytical scattering factors<sup>5</sup> for neutral atoms were used throughout the

analysis. Hydrogen atoms were located from a difference-Fourier map and refined ( $x, y, z$ , riding  $U_{iso}$ ). There was one molecule of water present per formula-unit.

At convergence,  $wR2 = 0.0683$  and  $Goof = 1.066$  for 253 variables refined against 3368 data ( $0.74\text{\AA}$ ),  $R1 = 0.0265$  for those \_ data with  $I > 2.0\sigma(I)$ . The absolute structure was assigned by refinement of the Flack parameter<sup>6</sup>.

### Pre-steady-state equations for kinetic analysis:

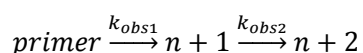

$$[\text{primer}] = A0e^{-k_{obs1}t} \quad \text{Equation 1}$$

$$[n + 1] = \frac{k_{obs1}A0}{k_{obs2} - k_{obs1}} (e^{-k_{obs1}t} - e^{-k_{obs2}t}) \quad \text{Equation 2}$$

$$[n + 2] = A0 - [\text{primer}] - [n + 1] \quad \text{Equation 3}$$

$$[n + 2] = A0 \left( 1 - \frac{k_{obs2}}{k_{obs2} - k_{obs1}} e^{-k_{obs1}t} + \frac{k_{obs1}}{k_{obs2} - k_{obs1}} e^{-k_{obs2}t} \right) \quad \text{Equation 4}$$

**Table S1. Crystal data and structure refinement for 5**

|                                         |                                                                                                    |
|-----------------------------------------|----------------------------------------------------------------------------------------------------|
| Temperature                             | 133(2) K                                                                                           |
| Wavelength                              | 0.71073 Å                                                                                          |
| Crystal system                          | Orthorhombic                                                                                       |
| Space group                             | <i>P2<sub>1</sub>2<sub>1</sub>2<sub>1</sub></i>                                                    |
| Unit cell dimensions                    | a = 5.2252(3) Å      α = 90 °<br>b = 10.9309(7) Å      β = 90 °<br>c = 24.2885(16) Å      γ = 90 ° |
| Volume                                  | 1387.27(15) Å <sup>3</sup>                                                                         |
| Crystal color                           | yellow                                                                                             |
| Crystal size                            | 0.380 x 0.240 x 0.212 mm <sup>3</sup>                                                              |
| Theta range for data collection         | 1.677 to 28.633 °                                                                                  |
| Index ranges                            | -7 ≤ h ≤ 6, -14 ≤ k ≤ 14, -31 ≤ l ≤ 32                                                             |
| Reflections collected                   | 16618                                                                                              |
| Independent reflections                 | 3368 [R(int) = 0.0302]                                                                             |
| Completeness to theta = 25.500 °        | 99.9 %                                                                                             |
| Absorption correction                   | Semi-empirical from equivalents                                                                    |
| Max. and min. transmission              | 0.8621 and 0.8216                                                                                  |
| Refinement method                       | Full-matrix least-squares on F <sup>2</sup>                                                        |
| Data / restraints / parameters          | 3368 / 0 / 253                                                                                     |
| Goodness-of-fit on F <sup>2</sup>       | 1.066                                                                                              |
| Final R indices [I > 2σ(I) = 3278 data] | R1 = 0.0265, wR2 = 0.0676                                                                          |
| R indices (all data, 0.74 Å)            | R1 = 0.0273, wR2 = 0.0683                                                                          |
| Absolute structure parameter            | -0.01(2)                                                                                           |
| Largest diff. peak and hole             | 0.283 and -0.206 e.Å <sup>-3</sup>                                                                 |

**Table S2. Oligonucleotides used in this study**

| Name            | Sequence (5'-3')                                                                                         | Mol. Wt. (Calc.) | Mol. Wt. (Found)     |
|-----------------|----------------------------------------------------------------------------------------------------------|------------------|----------------------|
| PBS2-1G         | ACTATTCAACTTACAATCGTATCAACCTTATAAT<br>CCTTGGCTACTGCATACGAGTGTC                                           | 18286.9          | 18286.8 <sup>a</sup> |
| PBS2-2G         | ACTATTCAACTTACAATGGTATCAACCTTATAAT<br>CCTTGGCTACTGCATACGAGTGTC                                           | 18326.9          | 18326.6 <sup>a</sup> |
| PBS2-3G         | ACTATTCAACTTACAATGGGATCAACCTTATAAT<br>CCTTGGCTACTGCATACGAGTGTC                                           | 18352.0          | 18351.4 <sup>a</sup> |
| PSB7-1G         | TTTGCCGTCTCAATGCACTGACGATCC                                                                              | 8186.3           | 8185.6 <sup>a</sup>  |
| PBS7-2G         | TTTGCCGGTCTCAATGCACTGACGATCC                                                                             | 8515.6           | 8515.2 <sup>a</sup>  |
| 4NT9G           | GGATCGTCAGTGCATTGAGATTAAGACTCGCCA<br>TGTTACGATCTGCCAAGTACAGCCTTGAATCGT<br>CACTGGTGGTATCCCCTTGGGGA/3'-ddC | 27768.0          | 27768.2 <sup>a</sup> |
| PBS8_Extra      | FAM/CTTTTAAGAACCGGACGAACGTCC<br>CCTTGGGGATACCACC                                                         | 12763.4          | 12763.9 <sup>a</sup> |
| PBS7            | GGATCGTCAGTGCATTGAGA                                                                                     | 6197.1           | 6196.3 <sup>a</sup>  |
| Extra           | CTTTTAAGAACCGGACGAAC                                                                                     | 6110.0           | 6110.2 <sup>a</sup>  |
| PBS7-TNA5-1G    | TTTTGCCGCCTATTCTCAATGCACTGACGATCC                                                                        | 9990.5           | 9989.6 <sup>a</sup>  |
| PBS2-IR800      | IR800/spacer/GCACTCGTATGCAGTAGCC                                                                         | 7875.8           | 7872.8 <sup>b</sup>  |
| PBS7-IR700      | IR700/GGATCGTCAGTGCATTGAGA                                                                               | 6951.0           | 6950.9 <sup>a</sup>  |
| PBS7-TNA5-IR800 | IR800/GGATCGTCAGTGCATTGAGAatagg<br>(low case is TNA)                                                     | 9145.6           | 9142.7 <sup>b</sup>  |

<sup>a</sup> Results provided by Integrated DNA Technologies (IDT). <sup>b</sup> Measured in the linear negative mode..

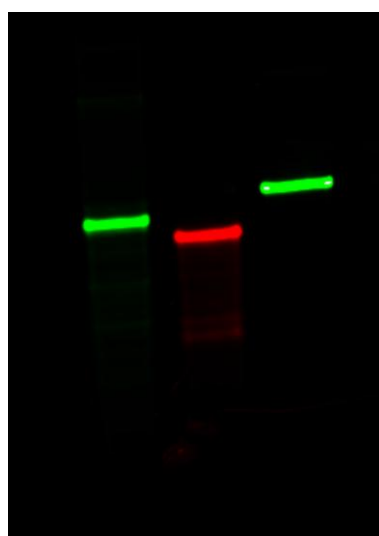**Figure S1. Purity analysis of IR-dye labelled primers (PBS2-IR800, PBS7-IR700 and PBS7-TNA5-IR800).** Analyzed by 20% denaturing urea PAGE and scanned by an ODYSSEY scanner.

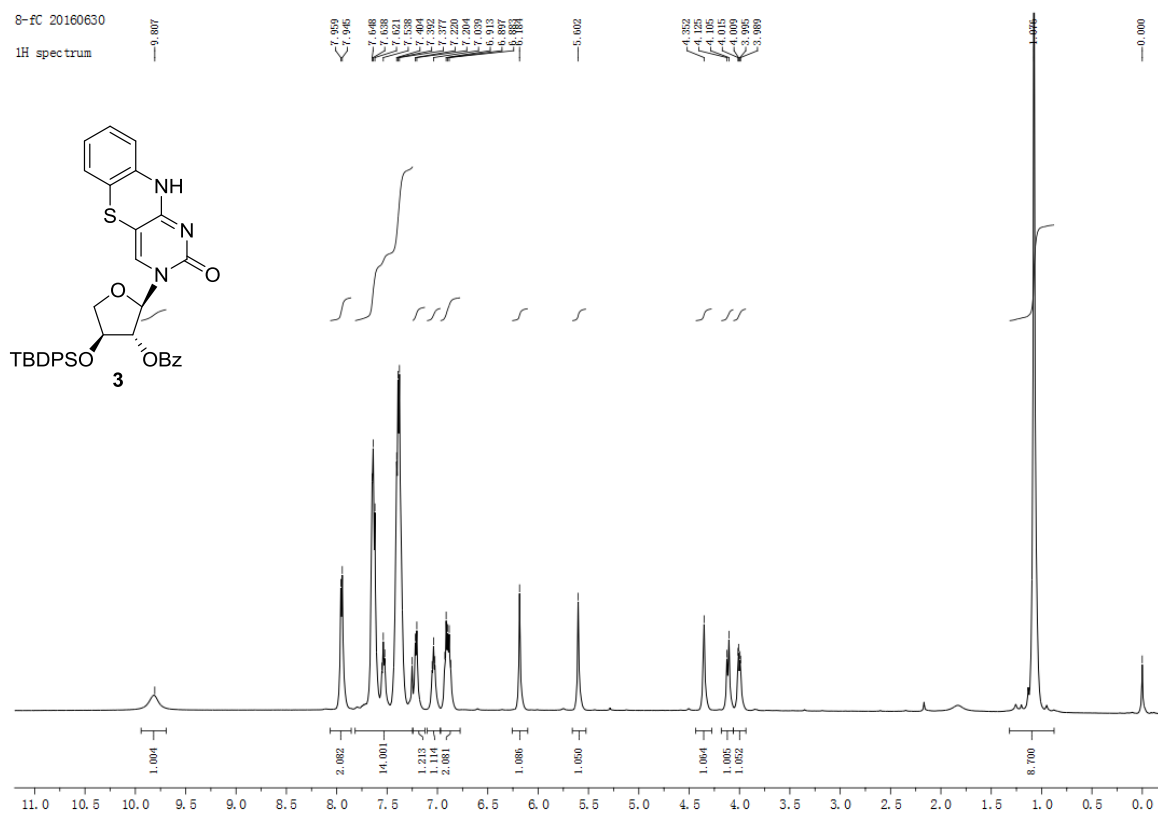

Figure S2.  $^1\text{H}$  NMR spectrum of compound **3** (500 MHz,  $\text{CDCl}_3$ ).

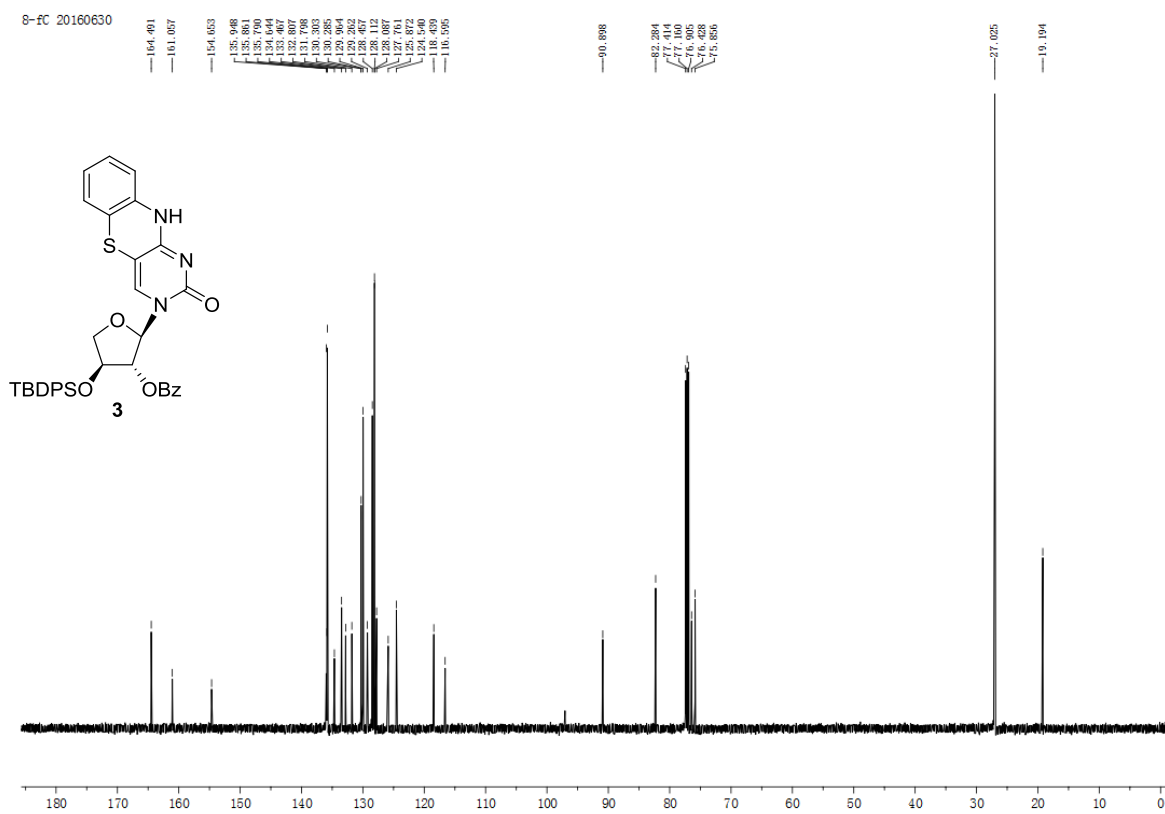

Figure S3.  $^{13}\text{C}$  NMR spectrum of compound **3** (125.8 MHz,  $\text{CDCl}_3$ ).

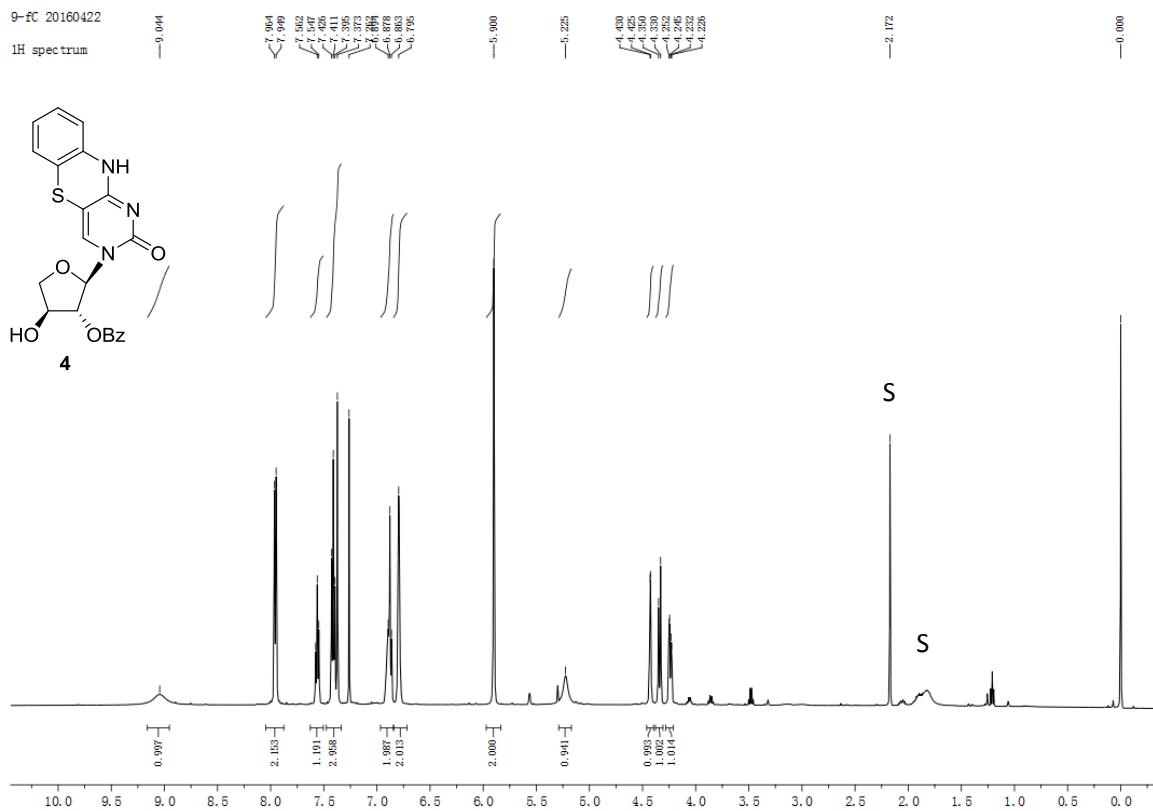

**Figure S4.**  $^1\text{H}$  NMR spectrum of compound **4** (500 MHz,  $\text{CDCl}_3$ ).

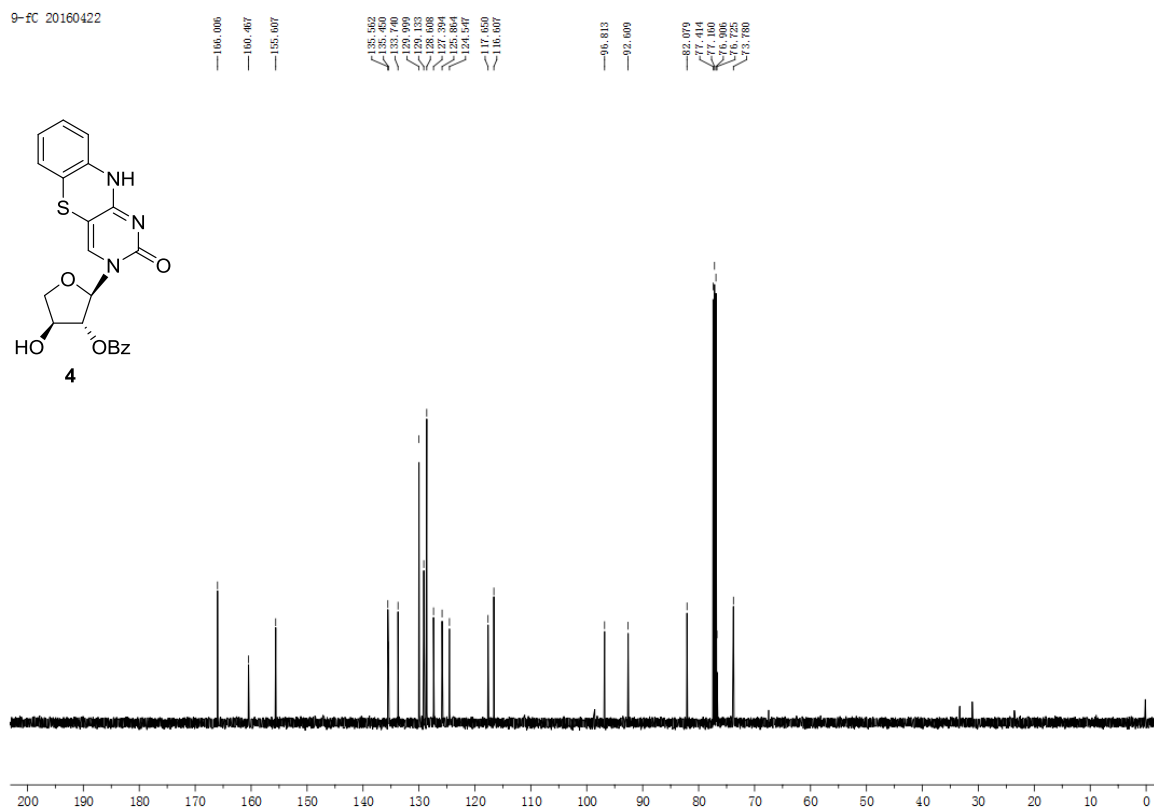

**Figure S5.**  $^{13}\text{C}$  NMR spectrum of compound **4** (125.8 MHz,  $\text{CDCl}_3$ ).



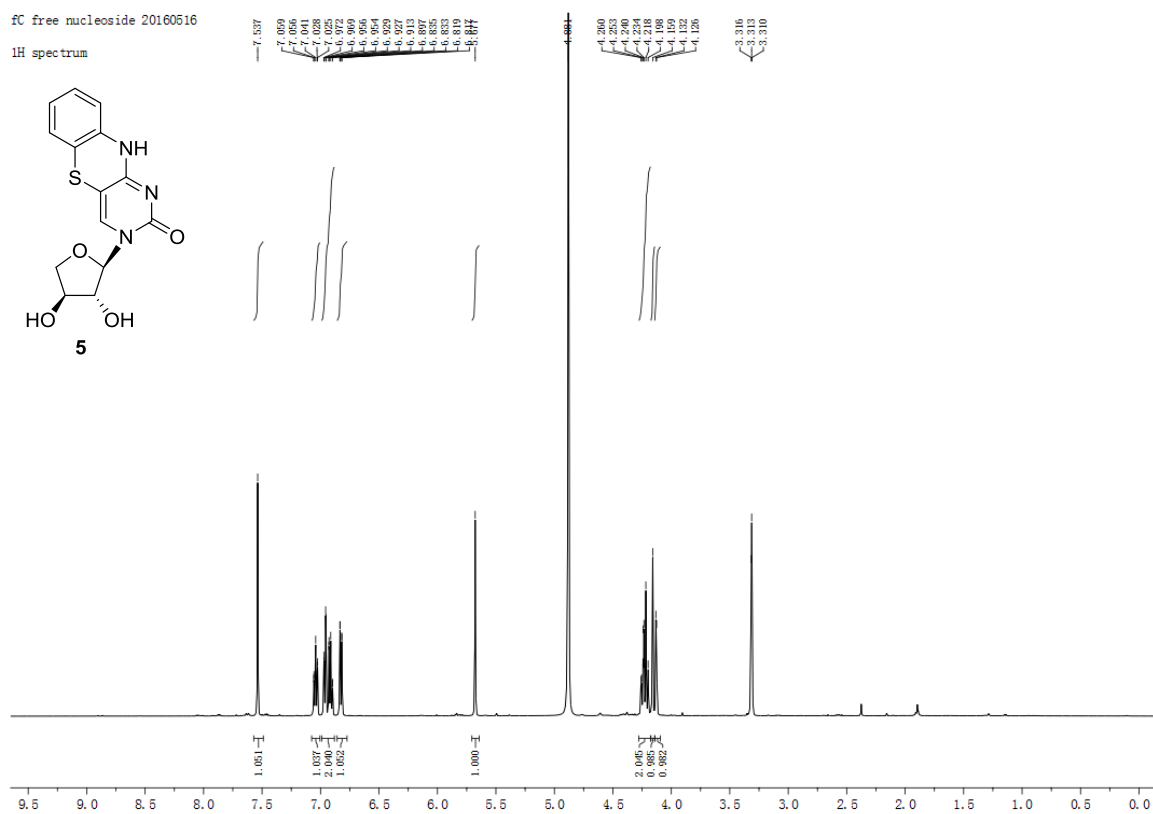

**Figure S6.** <sup>1</sup>H NMR spectrum of compound **5** (500 MHz, CD<sub>3</sub>OD).

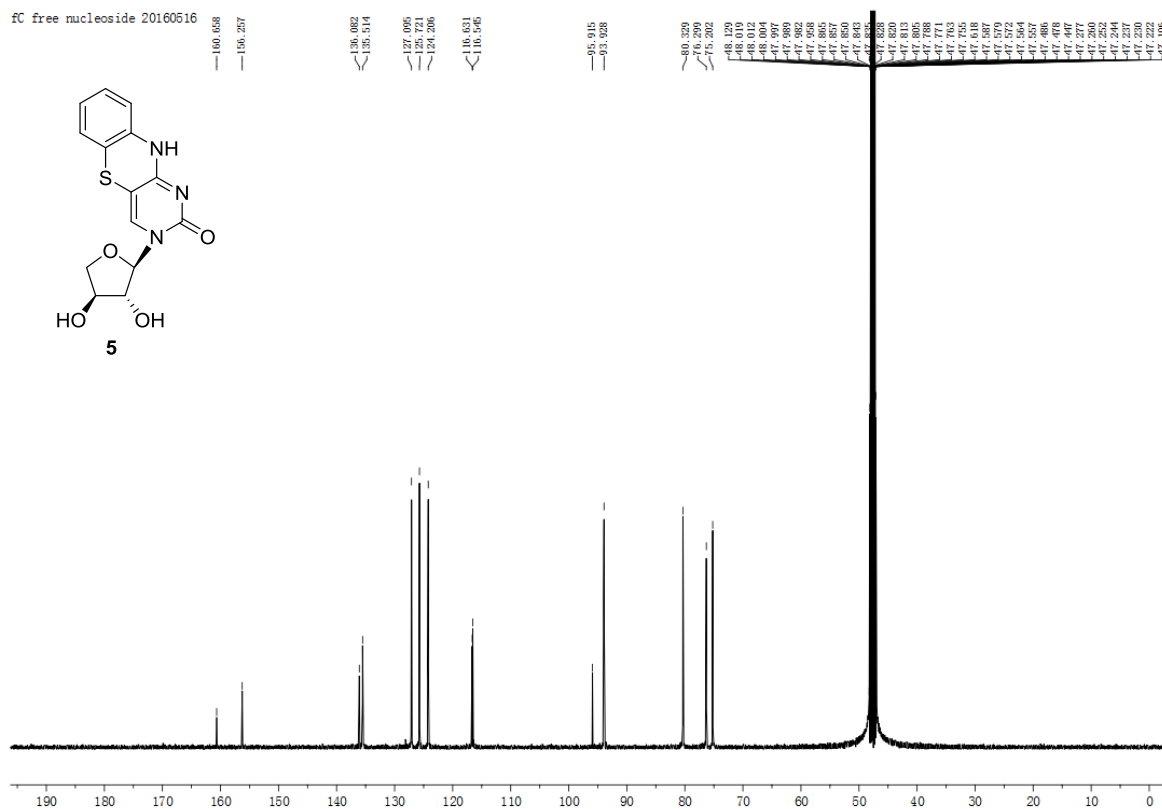

**Figure S7.** <sup>13</sup>C NMR spectrum of compound **5** (125.8 MHz, CD<sub>3</sub>OD).

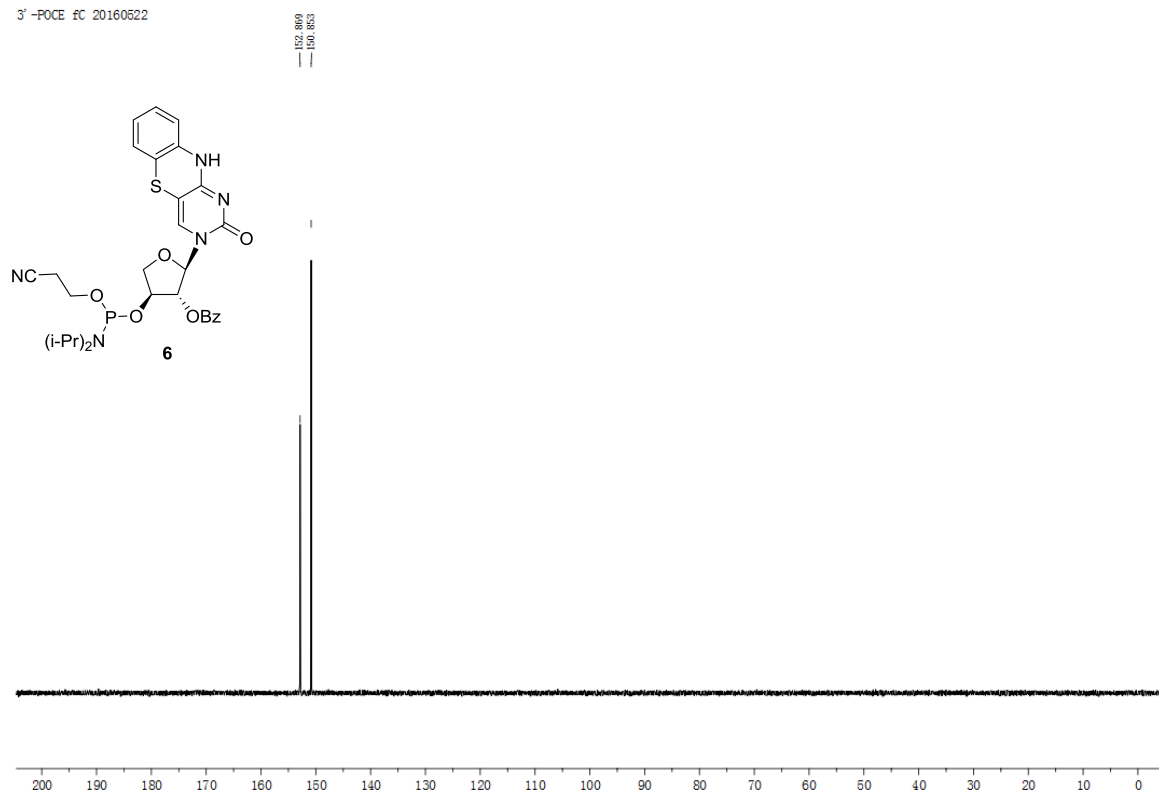

**Figure S8.**  $^{31}\text{P}$  NMR spectrum of compound **6** (162 MHz,  $\text{CDCl}_3$ ).

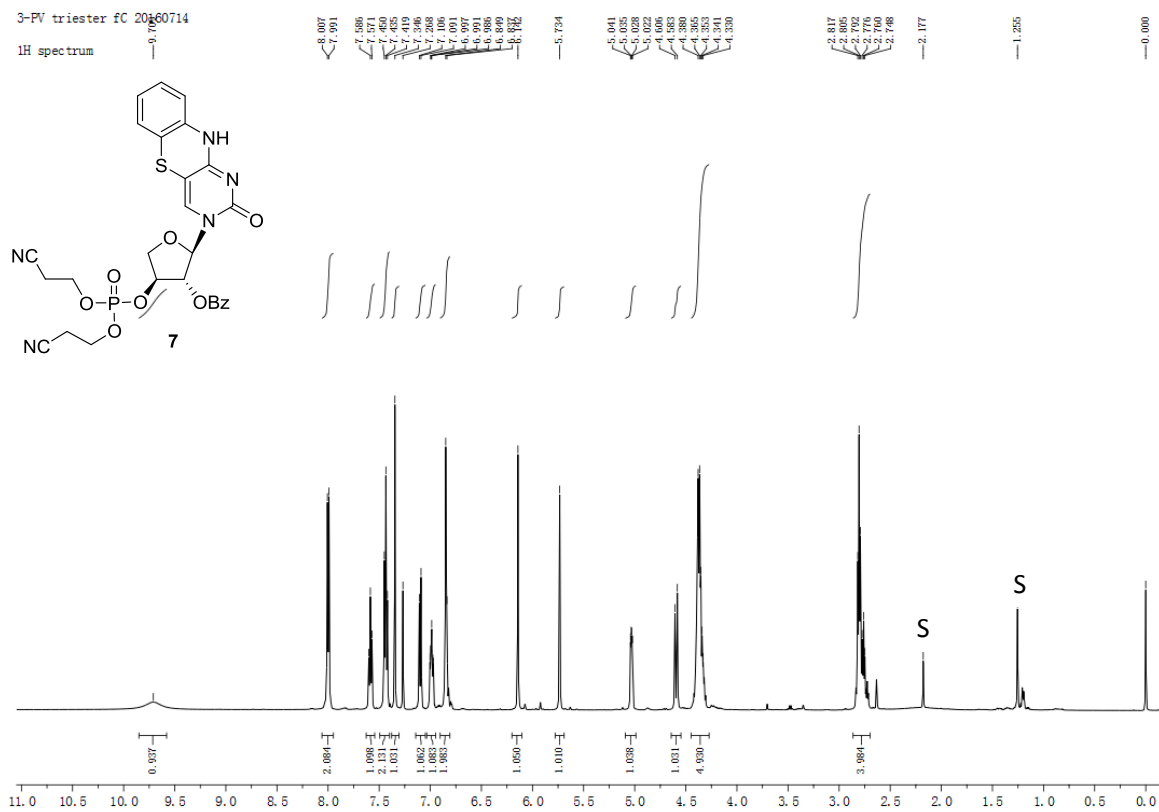

**Figure S9.**  $^1\text{H}$  NMR spectrum of compound **7**  $^1\text{H}$  NMR (500 MHz,  $\text{CDCl}_3$ ).

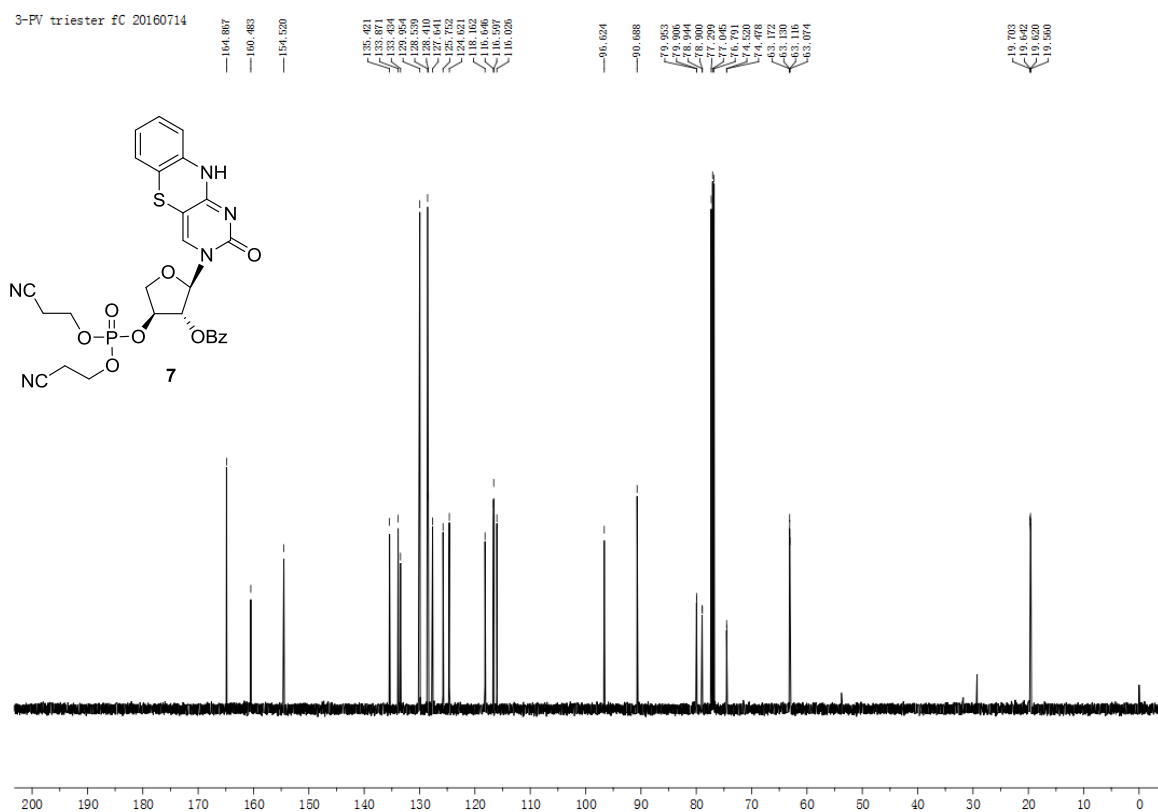

**Figure S10.**  $^{13}\text{C}$  NMR spectrum of compound **7** (125.8 MHz,  $\text{CDCl}_3$ ).

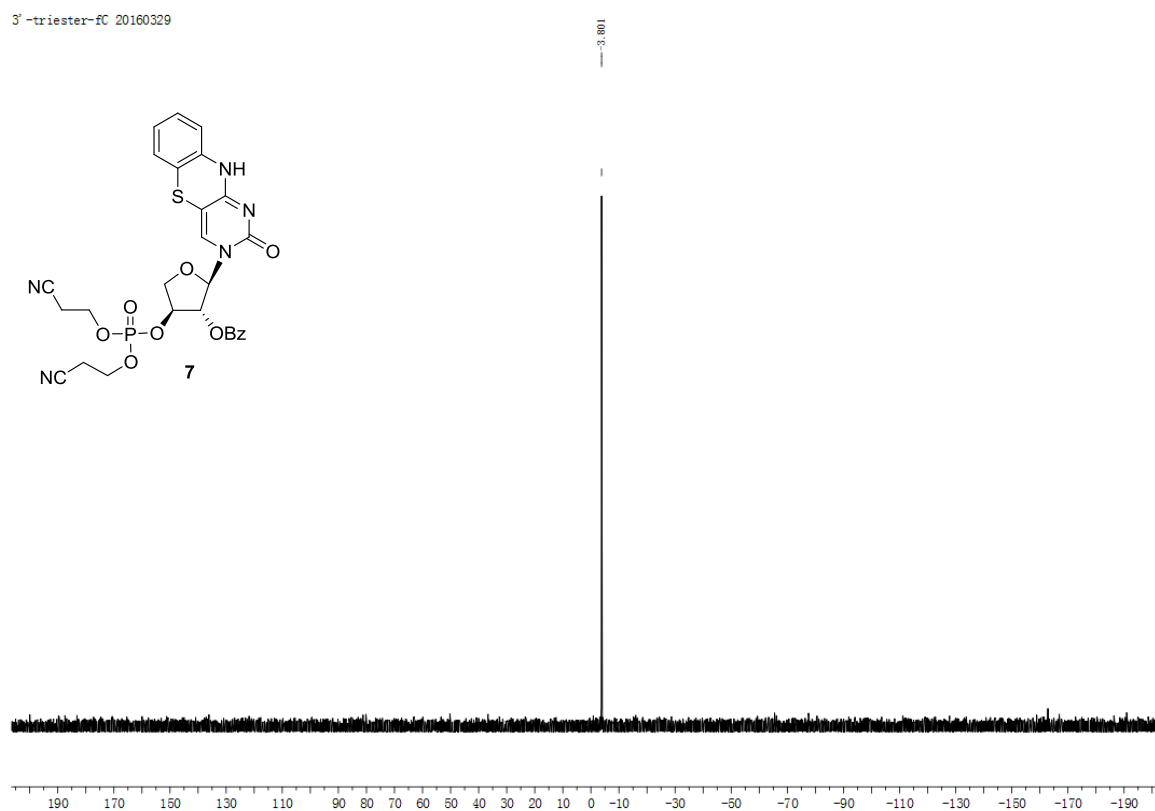

**Figure S11.**  $^{31}\text{P}$  NMR spectrum of compound **7** (162 MHz,  $\text{CDCl}_3$ ).

3'-monophosphate-fC 20160329  
31P spectrum with 1H decoupling

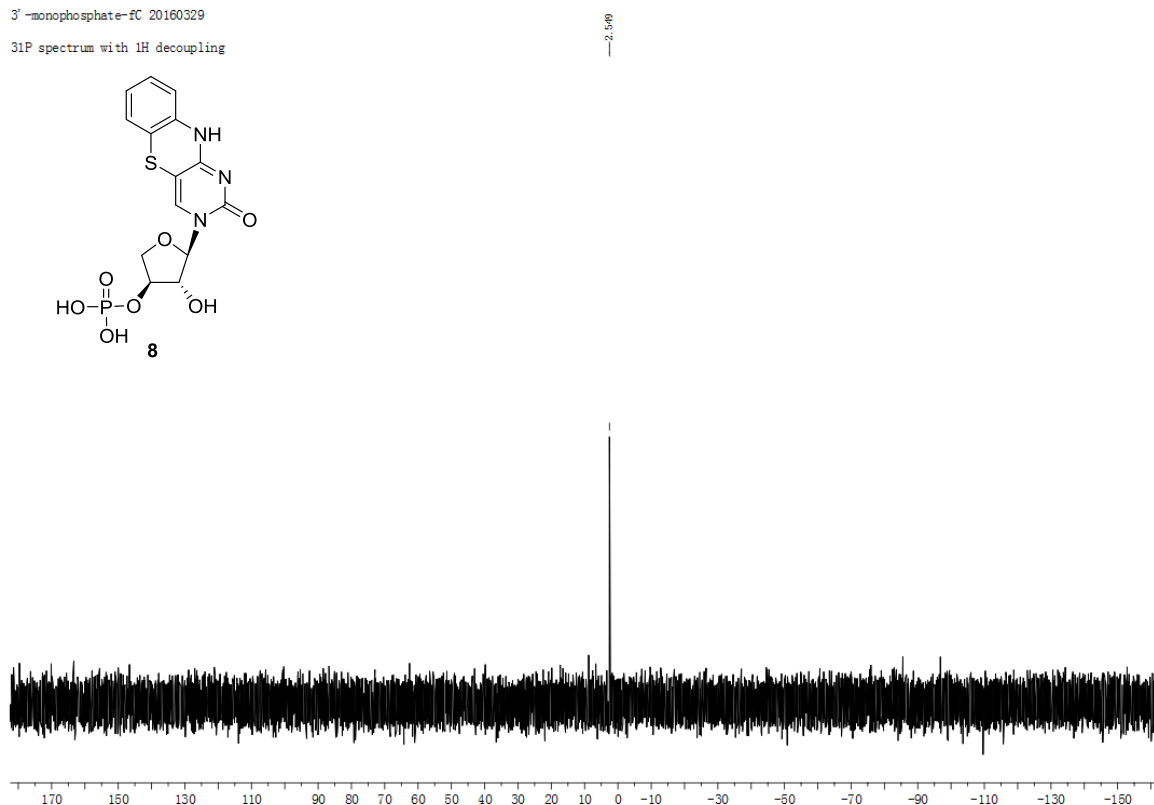

**Figure S12.** <sup>31</sup>P NMR spectrum of compound **8** (162 MHz, D<sub>2</sub>O).

fC-mp-imidazole

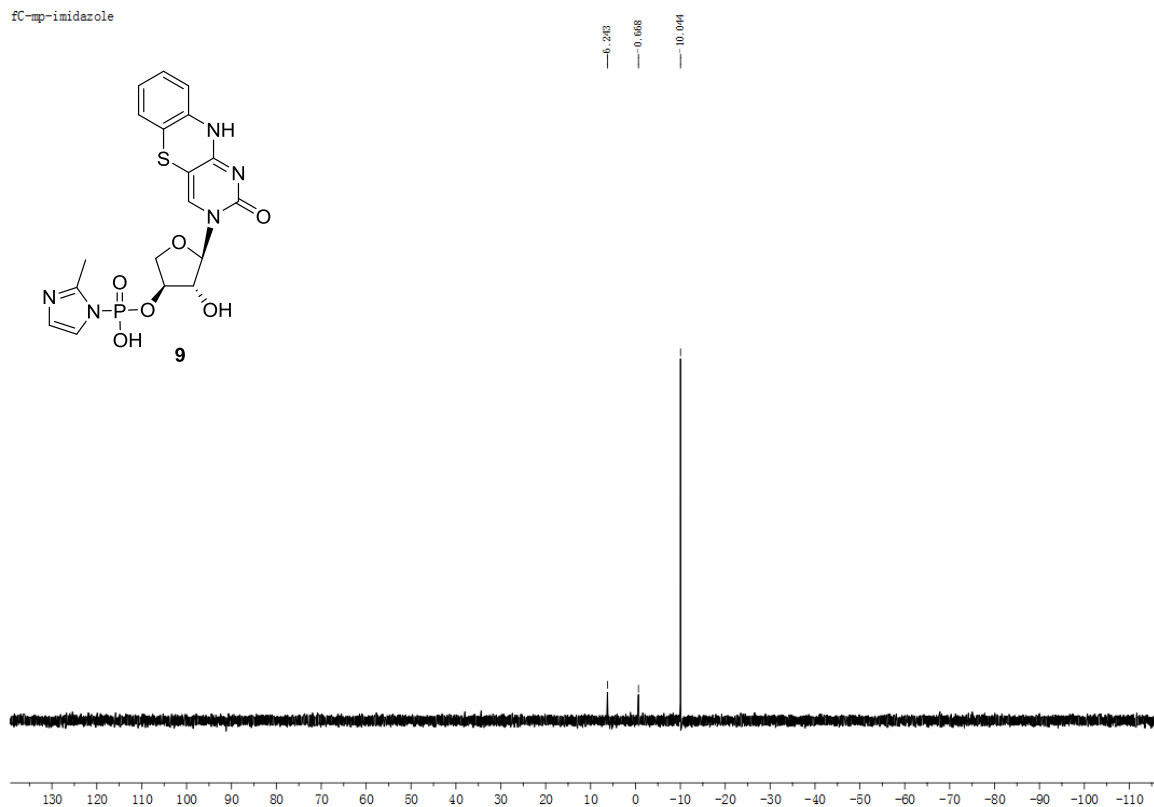

**Figure S13.** <sup>31</sup>P NMR spectrum of compound **9** (162 MHz, DMSO-d<sub>6</sub>).

tfCTP 20160522

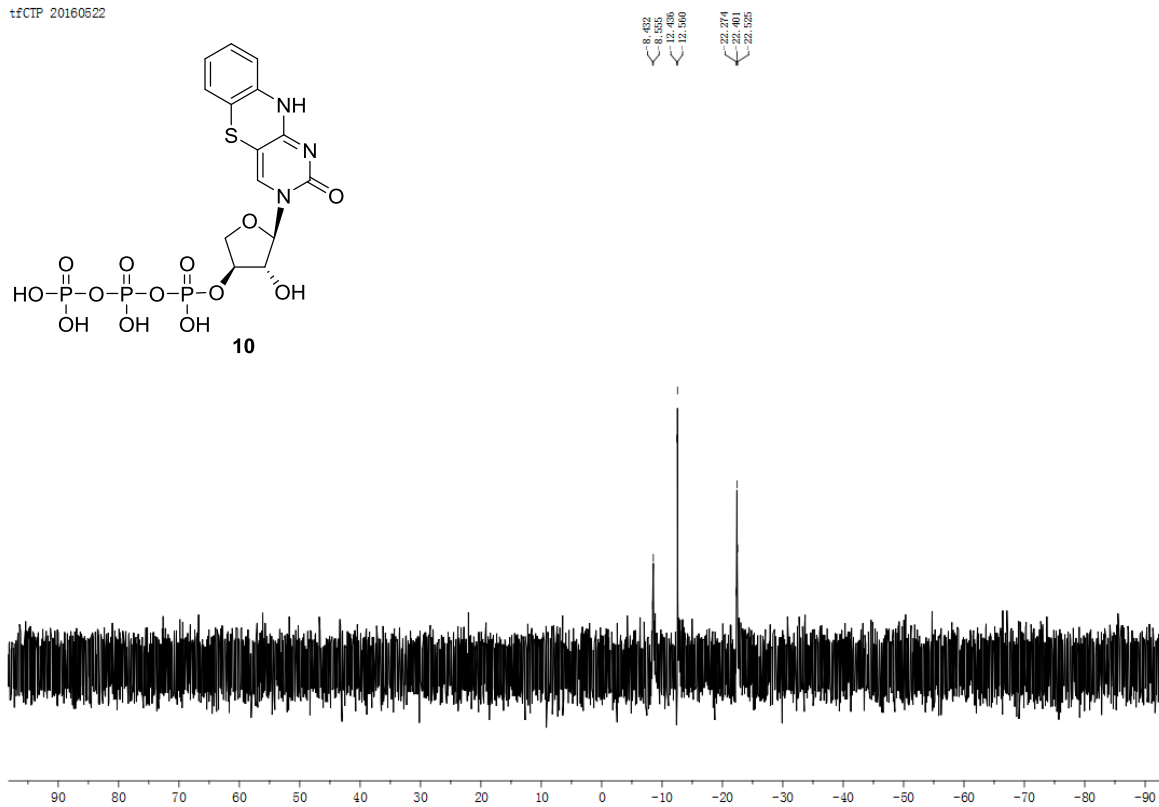

**Figure S14.**  $^{31}\text{P}$  NMR spectrum of compound **10** (162 MHz,  $\text{D}_2\text{O}$ ).
